# Supplementary material for: What are the research priorities for idiopathic intracranial hypertension? A priority setting partnership between patients and healthcare professionals
Source: PubMed Central journal article supplement (PMC6429891; doi:10.1136/bmjopen-2018-026573), 2019-03-15
Supplement: bmjopen-2018-026573supp002.pdf [file bmjopen-2018-026573supp002.pdf]

**Supplemental table 2:** The prioritisation survey was designed using Qualtrics software ([www.qualtrics.com](http://www.qualtrics.com)) and responses were requested to the following seven questions:

|    |                                                                                                                            |
|----|----------------------------------------------------------------------------------------------------------------------------|
| 1. | What questions do you have about how the diagnosis of IIH is made?                                                         |
| 2. | What questions do you have about why people get IIH?                                                                       |
| 3. | What questions do you have about the management of vision in IIH?                                                          |
| 4. | What questions do you have about the management of headache in IIH?                                                        |
| 5. | What questions do you have about weight management in IIH?                                                                 |
| 6. | What questions do you have about care provision for patients with IIH? (e.g. General Practice, inpatient, outpatient care) |
| 7. | Do you have any other questions about IIH that you feel are important but do not fall into the categories above?           |
