# Supplementary material for: What are the research priorities for idiopathic intracranial hypertension? A priority setting partnership between patients and healthcare professionals
Source: PubMed Central journal article supplement (PMC6429891; doi:10.1136/bmjopen-2018-026573), 2019-03-15
Supplement: bmjopen-2018-026573supp003.pdf [file bmjopen-2018-026573supp003.pdf]

**Supplemental table 3: Partner organisations in alphabetical order**

|                                                                         |
|-------------------------------------------------------------------------|
| ABN - Association of British Neurologists                               |
| BASH - British Association for the Study of Headache                    |
| BIOS - British and Irish Orthoptic Society                              |
| Fight for Sight – The Eye Research Charity                              |
| RCOphth – The Royal College of Ophthalmologists                         |
| SBNS CSF subgroup - The Society of British Neurological Surgeons        |
| Shine – Spina bifida, Hydrocephalus, Information, Networking, Equality  |
| The Neurological Alliance                                               |
| UKNOSIG - The United Kingdom Neuro-Ophthalmology Special Interest Group |
