# Supplementary material for: What are the research priorities for idiopathic intracranial hypertension? A priority setting partnership between patients and healthcare professionals
Source: PubMed Central journal article supplement (PMC6429891; doi:10.1136/bmjopen-2018-026573), 2019-03-15
Supplement: bmjopen-2018-026573supp004.pdf [file bmjopen-2018-026573supp004.pdf]

**Supplementary Table 4: Characteristics of participants with IIH of first survey**

|                             |     |
|-----------------------------|-----|
| Number                      | 180 |
| Female (%)                  | 96  |
| Median age (years)          | 35  |
| Ethnicity (%)               |     |
| White                       | 92  |
| Black or Asian              | 3   |
| Multiple ethnic backgrounds | 4   |
| Not stated                  | 1   |
