# Supplementary material for: What are the research priorities for idiopathic intracranial hypertension? A priority setting partnership between patients and healthcare professionals
Source: PubMed Central journal article supplement (PMC6429891; doi:10.1136/bmjopen-2018-026573), 2019-03-15
Supplement: bmjopen-2018-026573supp005.pdf [file bmjopen-2018-026573supp005.pdf]

**Supplementary Table 5: Declared specialism of the healthcare professionals in first survey**

| <b>Declared specialism of the healthcare professional</b> | <b>% of respondents</b> |
|-----------------------------------------------------------|-------------------------|
| Neurologist                                               | 45                      |
| Ophthalmologist                                           | 11                      |
| Neurosurgeon                                              | 10                      |
| Neuro-Ophthalmologist                                     | 9                       |
| Other                                                     | 8                       |
| Trainee                                                   | 6                       |
| Bariatric Surgeon                                         | 3                       |
| General Practitioner                                      | 3                       |
| Nurse                                                     | 2                       |
| Neuroradiologist                                          | 1                       |
| Orthoptist                                                | 1                       |
| Not declared                                              | 1                       |
