# Supplementary material for: What are the research priorities for idiopathic intracranial hypertension? A priority setting partnership between patients and healthcare professionals
Source: BMJ Open. 2019 Mar 15;9(3):e026573. doi: 10.1136/bmjopen-2018-026573 (PMC6429891; doi:10.1136/bmjopen-2018-026573)
Supplement: Supplementary file 1 [file bmjopen-2018-026573supp001.pdf]

**Supplemental table 1: The steering group members and their role**

| <b>Person</b>       | <b>Role</b>                                         |
|---------------------|-----------------------------------------------------|
| Krystal Hemmings    | IIH UK Research representative and PSP patient led  |
| Alex Sinclair       | Clinical lead and neurologist                       |
| Michelle Williamson | IIH UK Chair trustee, project coordinator and carer |
| Clare Herd          | Information specialist                              |
| Martin Plowright    | IIH patient                                         |
| Norma-Ann Dan       | IIH UK patient representative                       |
| Amanda Denton       | IIH UK patient representative                       |
| Rachel Bennett      | IIH patient                                         |
| Jayne Best          | Neuro-Ophthalmologist                               |
| Arun Chandran       | Neuro-radiologist                                   |
| Julie Edwards       | Headache nurse specialist                           |
| Anita Krishnan      | Neurologist                                         |
| Kamal Mahawar       | Bariatric surgeon                                   |
| Susan Mollan        | Neuro-Ophthalmologist                               |
| Caroline Rick       | Trial methodologist                                 |
| Ahmed Toma          | Neurosurgeon                                        |
